# Supplementary material for: In vitroselection of DNA aptamers for the development of chemiluminescence aptasensor for neuron-specific enolase (NSE) detection
Source: Royal Society of Chemistry journal article supplement (doi:10.1039/c9ra00785g), 2019-01-01
Supplement: c9ra00785g1.pdf [file c9ra00785g1.pdf]

Table S1 A list of all sequences identified from the 40-nt randomized region of the library after  
10 rounds of subtractive SELEX against NSE.

| Aptamer | Sequence (5'-3')                           |
|---------|--------------------------------------------|
| Apt-1   | TAACTCGTCCCTACCGAGCCTCTCTCTGGTCCTTGCAACT   |
| Apt-2   | TCTCAGGGTGGGTGGGTGTATCTCCCTTTGATACTTGGGT   |
| Apt-5   | TCACACACGGACCTCTCCTACATTAATTGCGCATTTCGTT   |
| Apt-6   | TCTCACCTCGACACTCATATCTCTACTCCACCGATAGTA    |
| Apt-9   | CCTTGTCGATTCATAATGTTTCGTGGAACCTCGCTCTCGGGA |
| Apt-10  | CTTCTTCTTGTTAAGGCAGCTACACGGCTACCGGATATGA   |
| Apt-11  | ATACTGAAACATATGAGATGCCCGCTCGCTATCTAATCGC   |
| Apt-12  | TCTCCAACCCAATCCTGTGTTTCGCGCTGAATCCATCTGT   |
| Apt-14  | CTAGATCCCACATGCCTTCAGTGTTTGTTGCCGTAAACTC   |
| Apt-15  | TAACTCGTCCCTACCGAGCCTCTCTCTGGTCCTTGTAAC    |
| Apt-16  | CTCTGATCTCCTGCTTTGGCCTAGACTGCCCGGGTTCCAC   |
| Apt-18  | CTTGCCGGGTCATCCGAGAACAGGAGCCCACGATGCGATC   |
| Apt-19  | CTTCGAGCCACACTGTTTGTCTTCTGCTCTAATCATCTA    |
| Apt-21  | TTCTACCATCGACCCTGTCCGCGTTCGATACCGCCGGAGA   |
| Apt-22  | CAGATCTGTGGATGATCCCTCTTGGTTGTTCCCGACCTCG   |
| Apt-24  | CCTCCTCTGTTACCATATCGATCGCATCTCTCGCGCCCTA   |
| Apt-25  | TCTCCTCTGGCTATTTACCGTTAACAGCTCACGTTTGTGA   |
| Apt-26  | GGGTTTAATTGCTCTCAGGTTATTCGTCTGAGGTAATGCG   |
| Apt-28  | ATCACGAATGTCGAGGCTCCTTTCCGCCCTGTCTGCTCGT   |
| Apt-30  | CTACATCTAGTCCTGATAATGCTAGTTCATTGGGAATCCT   |
